# Supplementary material for: dNTP pool modulation dynamics by SAMHD1 protein in monocyte-derived macrophages
Source: PubMed Central journal article supplement (PMC4161909; doi:10.1186/s12977-014-0063-2), 2014-08-27
Supplement: 12977_2014_63_MOESM1_ESM.pdf [file 12977_2014_63_MOESM1_ESM.pdf]

Hollenbaugh et al., dNTP Pool Modulation Dynamics by SAMHD1 Protein in Monocyte-derived Macrophages

Additional file 1

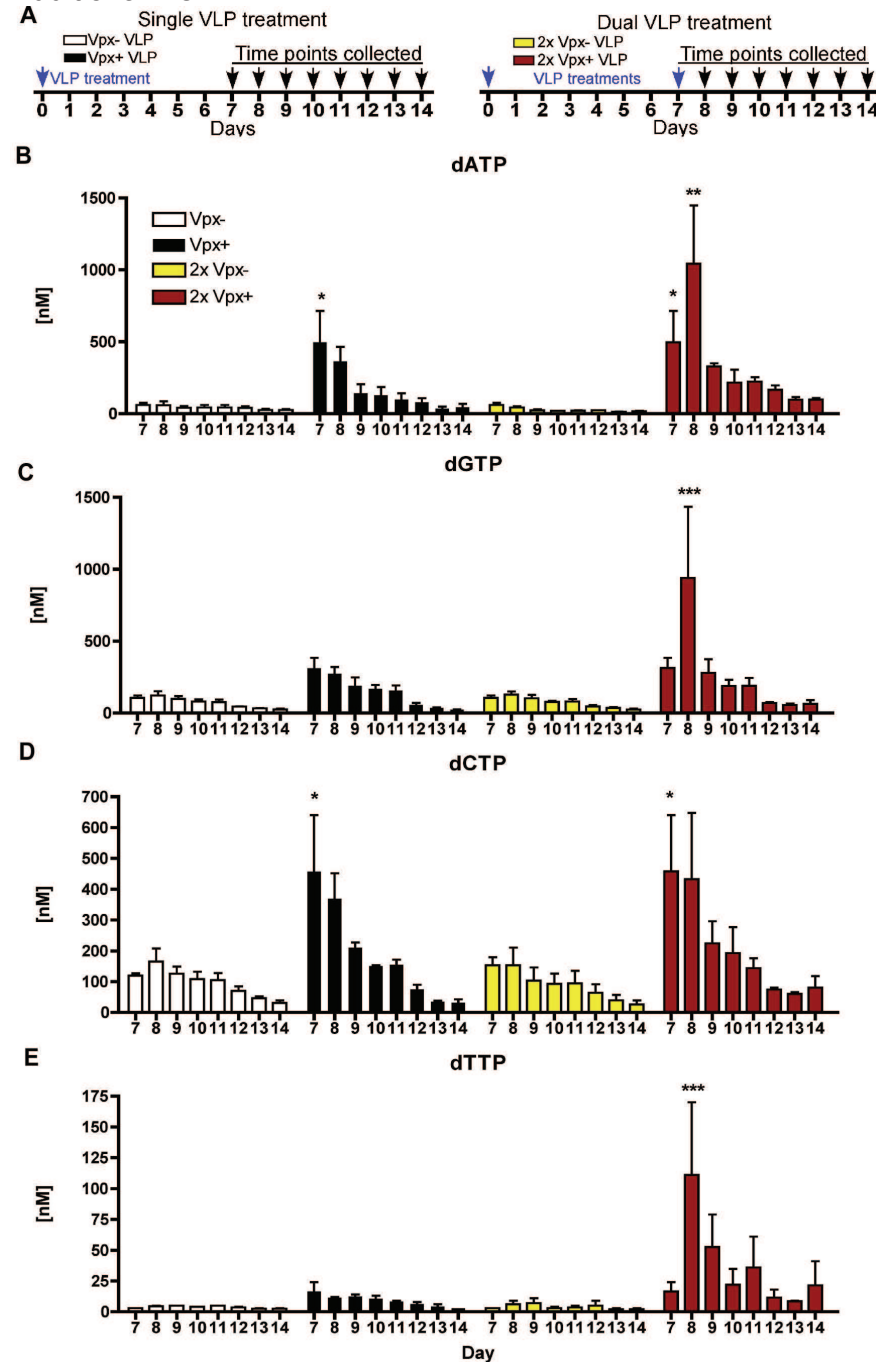

**Additional file 1: Dual Vpx+ VLP Kinetic Analysis.** (A) Diagram showing the treatment regime for single and dual VLP treatments and the days harvested after treatment. (B-E) The HIV-1 RT-based dNTP assay was performed on samples to determine concentrations of the four different metabolites. Two-way-ANOVA was applied to determine significant differences within each group indicated (\*,  $P < 0.05$ ; \*\*,  $P < 0.01$  and \*\*\*,  $P < 0.001$ ). Analysis was done for two independent MDM donors.
