# Supplementary material for: dNTP pool modulation dynamics by SAMHD1 protein in monocyte-derived macrophages
Source: PubMed Central journal article supplement (PMC4161909; doi:10.1186/s12977-014-0063-2), 2014-08-27
Supplement: 12977_2014_63_MOESM2_ESM.pdf [file 12977_2014_63_MOESM2_ESM.pdf]

Hollenbaugh et al., dNTP Pool Modulation Dynamics by SAMHD1 Protein in Monocyte-derived Macrophages

Additional file 2

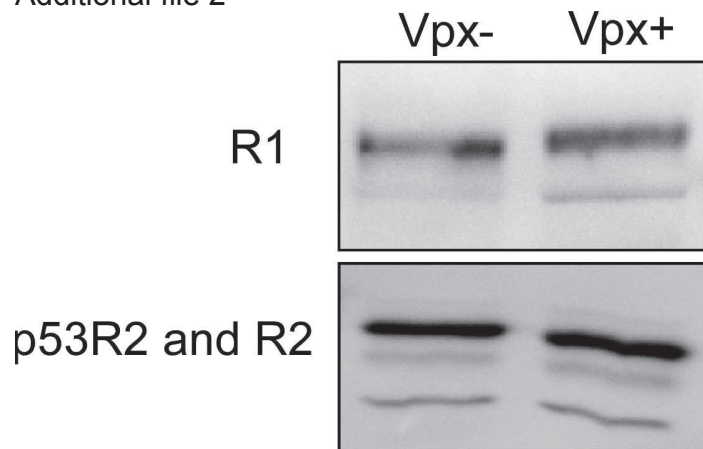

**Additional file 2: Analysis of RNR subunits.** MDMs were treated with VLP for 24 h and then processed for cellular lysates. Western blot analysis was performed using 25  $\mu$ g total protein to detect the major subunit, R1 (Abcam), or the small subunits R2 and p53R2 (Santa Cruz). No significant changes in RNR expression levels were detected.
