# Supplementary material for: dNTP pool modulation dynamics by SAMHD1 protein in monocyte-derived macrophages
Source: PubMed Central journal article supplement (PMC4161909; doi:10.1186/s12977-014-0063-2), 2014-08-27
Supplement: 12977_2014_63_MOESM3_ESM.pdf [file 12977_2014_63_MOESM3_ESM.pdf]

Hollenbaugh et al., dNTP Pool Modulation Dynamics by SAMHD1 Protein in Monocyte-derived Macrophages

Additional file 3

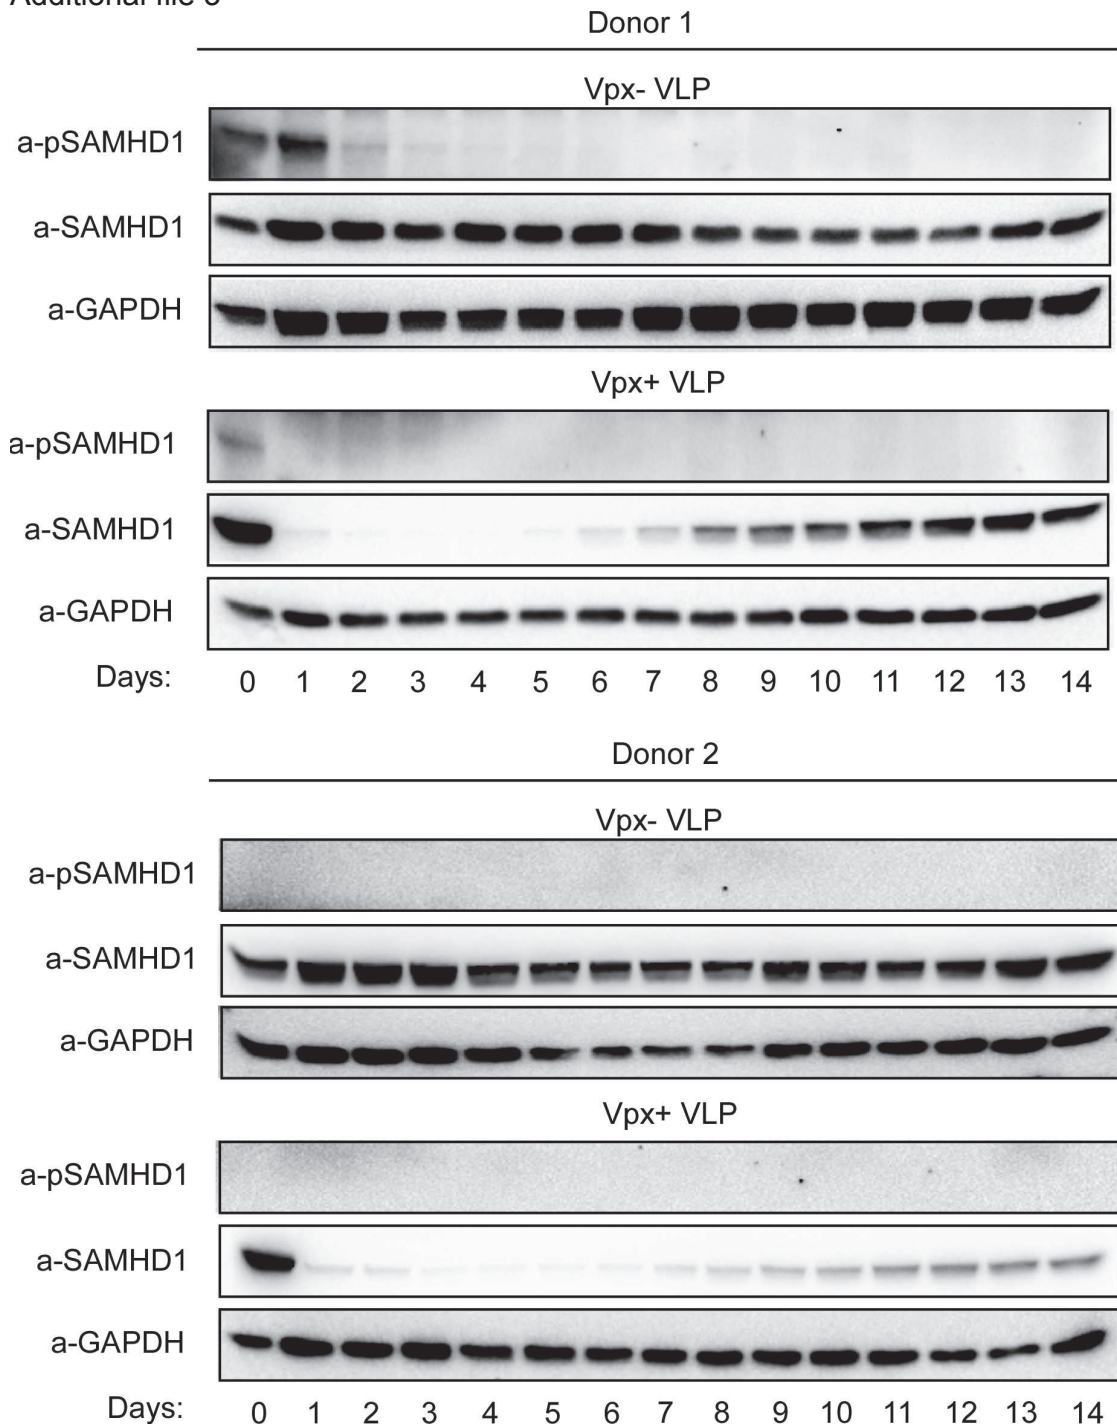

**Additional file 3: Analysis of pSAMHD1 at 592.** Two independent MDM donors were examined for pSAMHD1 by immunoblot analysis (20  $\mu$ g protein). Total SAMHD1 was determined and GAPDH was used as the internal loading control.
