# Supplementary material for: dNTP pool modulation dynamics by SAMHD1 protein in monocyte-derived macrophages
Source: PubMed Central journal article supplement (PMC4161909; doi:10.1186/s12977-014-0063-2), 2014-08-27
Supplement: 12977_2014_63_MOESM5_ESM.pdf [file 12977_2014_63_MOESM5_ESM.pdf]

Hollenbaugh et al., dNTP Pool Modulation Dynamics by SAMHD1 Protein in Monocyte-derived Macrophages

Additional file 5

| Analytes | Parent Ion | Product Ion | Collision Energy (v) | Tube Lens Offset (v) |
|----------|------------|-------------|----------------------|----------------------|
| dAMP +   | 332.1      | 136         | 16                   | 52                   |
| dGMP +   | 348.1      | 152         | 14                   | 55                   |
| dCMP +   | 308        | 112         | 14                   | 65                   |
| TMP -    | 321        | 79          | 50                   | -90                  |
| dADP +   | 412        | 136         | 15                   | 95                   |
| dGDP +   | 428        | 152         | 15                   | 107                  |
| dCDP +   | 388        | 112         | 23                   | 95                   |
| TDP -    | 401        | 158.9       | 27                   | -81                  |
| dATP +   | 492        | 136         | 28                   | 140                  |
| dGTP +   | 508        | 152         | 22                   | 146                  |
| dCTP +   | 468        | 112         | 28                   | 130                  |
| TTP -    | 481        | 158.9       | 30                   | -89                  |

**Additional file 5: HPLC-MS settings for instrument optimization.** Each metabolite was purchased from Sigma and then ran on the HPLC-MS to optimize the reading. Then setting were then used to generate a concentration curve that was applied to determine the concentrations of these metabolites in MDMs treated with Vpx+ VLP and Vpx- VLPs.
